# Supplementary material for: Stepwise coordination of {Cu(C 5 Me 5 )} with a tri-silylated Ge 9 cluster
Source: Royal Society of Chemistry journal article supplement (doi:10.1039/d5cc06017f), 2026-01-01
Supplement: d5cc06017f1.pdf [file d5cc06017f1.pdf]

## SUPPORTING INFORMATION

### Stepwise coordination of {Cu(C<sub>5</sub>Me<sub>5</sub>)} with tri-silylated Ge<sub>9</sub> cluster

Tianzi Chen,<sup>a</sup> Xinyue Wang,<sup>a</sup> Yulin Han,<sup>a</sup> Chenxi Guo,<sup>a</sup> Dongyu Duan,<sup>a</sup> Yu Tang,<sup>\*a</sup> and Fuxing Pan<sup>\*a</sup>

---

<sup>a</sup> *State Key Laboratory of Applied Organic Chemistry, Key Laboratory of Nonferrous Metal Chemistry and Resources Utilization of Gansu Province, College of Chemistry and Chemical Engineering, Lanzhou University, Lanzhou, 730000 China.*

\* tangyu@lzu.edu.cn; panfx@lzu.edu.cn

#### Contents:

1. Synthesis Details
2. Single-Crystal X-Ray Crystallography (SCXRD)
3. Energy Dispersive X-ray Spectroscopy (EDS) Analysis
4. NMR Spectra
5. References for the Supporting Information

## 1 Synthesis Details

### 1.1 General

All manipulations and reactions were performed under dry Ar atmosphere using standard Schlenk or glovebox techniques. All solvents were dried and freshly distilled prior to use. Crypt-222<sup>[1]</sup> was dried in vacuo for at least 18 hours. HypCl<sup>[2]</sup>, CuI were purchased and used as received. K(C<sub>5</sub>Me<sub>5</sub>) is prepared by reacting KHMDs<sup>[3]</sup> with H(C<sub>5</sub>Me<sub>5</sub>) (1:1) in toluene. K[Ge<sub>9</sub>Hyp<sub>3</sub>] and [K(crypt-222)][Ge<sub>9</sub>Hyp<sub>3</sub>] were prepared according to literatures.<sup>[4]</sup> Single crystal photos related to this work are shown in Figure S1-S3.

NMR spectra were measured on a Bruker Avance Ultrashield 400 MHz. The <sup>1</sup>H NMR and <sup>13</sup>C NMR spectra were calibrated using the residual signals of the used deuterated solvents. Chemical shifts are reported in parts per million (ppm) relative to TMS, with the solvent peaks serving as internal reference.<sup>[5]</sup> Abbreviations for signal multiplicities are: singlet (s), doublet (d).

### 1.2 Synthesis of [K(crypt-222)][Cu(C<sub>5</sub>Me<sub>5</sub>)(Ge<sub>9</sub>Hyp<sub>3</sub>)] ([K(crypt-222)]1)

181 mg (0.1 mmol) of [K(crypt-222)][Ge<sub>9</sub>Hyp<sub>3</sub>], 19 mg (0.1 mmol) of CuI and 18 mg (0.1 mmol) of K(C<sub>5</sub>Me<sub>5</sub>) were dissolved in THF (3 mL). The reaction mixture was stirred for 6 hours at room temperature. The resulting dark red solution was filtered, then carefully layered by n-hexane (3 mL), and stored for crystallization at -35 °C. After 3 days, orange block crystals of compound [K(crypt-222)]1 were observed in the test tube in approximately 75% yield overall.

<sup>1</sup>H NMR (400 MHz, THF-*d*<sub>8</sub>): δ [ppm] = 3.61 (d, *J* = 12.8 Hz, 24H), 2.60 (s, 12H), 1.99 (s, 15H), 0.30 (s, 81H). <sup>13</sup>C NMR (101 MHz, THF-*d*<sub>8</sub>): δ [ppm] = 105.21, 71.55, 68.70, 55.00, 12.01, 3.59. <sup>29</sup>Si NMR (79 MHz, THF-*d*<sub>8</sub>): δ [ppm] = -11.01, -109.02.

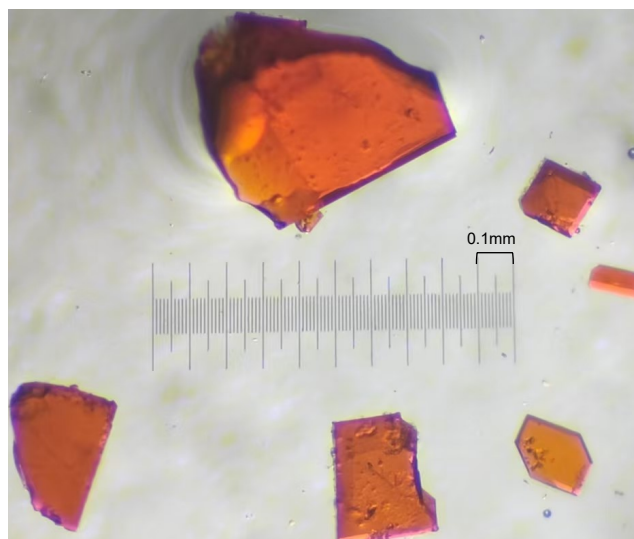

**Figure S1.** Crystal photographs of [K(crypt-222)]1 taken under a light microscope.

### 1.3 Synthesis of [K(crypt-222)][{Cu(C<sub>5</sub>Me<sub>5</sub>)<sub>2</sub>(Ge<sub>9</sub>Hyp<sub>3</sub>)}·0.3THF] ([K(crypt-222)]2·0.3THF)

202 mg (0.1 mmol) of [K(crypt-222)]1, 21 mg (0.11 mmol) of CuI and 20 mg (0.11 mmol) of K(C<sub>5</sub>Me<sub>5</sub>) were dissolved in THF (3 mL). The reaction mixture was stirred for 6 hours at room temperature. The resulting dark brown solution was filtered, then carefully layered by n-hexane (3 mL), and stored for crystallization at -35 °C. After 3 days, black block crystals of compound [K(crypt-222)]2·0.3THF were observed in the test tube in approximately 80% yield overall.

One pot: 181 mg (0.1 mmol) of [K(crypt-222)][Ge<sub>9</sub>Hyp<sub>3</sub>], 40 mg (0.21 mmol) of CuI and 36.8 mg (0.21 mmol) of K(C<sub>5</sub>Me<sub>5</sub>) were dissolved in THF (3 mL). The reaction mixture was stirred for 6 hours at room temperature. The resulting dark brown solution was filtered, then carefully layered by n-hexane (3 mL), and stored for crystallization at -35 °C. After 3 days, orange block crystals of compound [K(crypt-222)]1 (minor) and black block crystals of compound [K(crypt-222)]2·0.3THF (major) were observed in the test tube.

<sup>1</sup>H NMR (400 MHz, THF-*d*<sub>8</sub>): δ [ppm] = 3.61 (d, *J* = 12.9 Hz, 24H), 2.59 (s, 12H), 2.00 (s, 23H), 0.33 (s, 81H). <sup>13</sup>C NMR (101 MHz, THF-*d*<sub>8</sub>): δ [ppm] = 105.67, 71.53, 68.69, 54.99, 12.35, 3.69. <sup>29</sup>Si NMR (79 MHz, THF-*d*<sub>8</sub>): δ [ppm] = -9.11, -107.14.

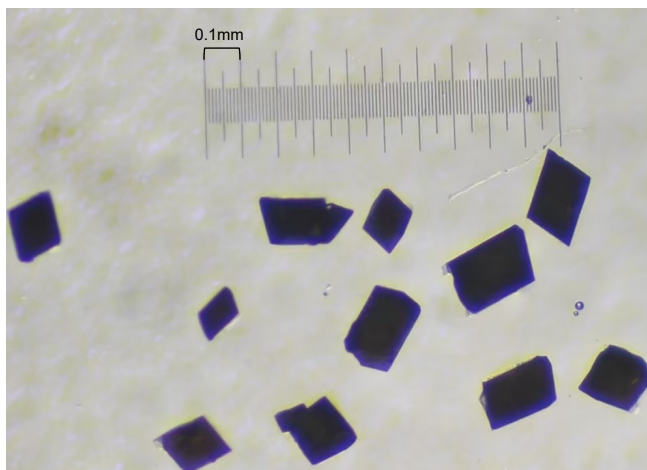

**Figure S2.** Crystal photographs of **[K(crypt-222)]2·0.3THF** taken under a light microscope.

#### 1.4 Synthesis of **[K(THF)<sub>6</sub>][Cu(Ge<sub>9</sub>Hyp<sub>3</sub>)<sub>2</sub>] ([K(THF)<sub>6</sub>]E)**

Compound **[Li(THF)<sub>6</sub>]E**, which was reported in ref.[6] to be obtained from a reaction of **[Li(THF)<sub>4</sub>][Ge<sub>9</sub>Hyp<sub>3</sub>]** in THF with **[Cu[Al(OCH(CF<sub>3</sub>)<sub>2</sub>)<sub>4</sub>]<sub>2</sub>]** in 1,2-F<sub>2</sub>C<sub>6</sub>H<sub>4</sub>.

**[K(THF)<sub>6</sub>]E** could be isolated selectively from a reaction of **K[Ge<sub>9</sub>Hyp<sub>3</sub>]** and CuI in THF: 144 mg (0.1 mmol) of **K[Ge<sub>9</sub>Hyp<sub>3</sub>]** and 10 mg (0.05 mmol) of CuI were dissolved in THF (3 mL). The reaction mixture was stirred for 6 hours at room temperature. The resulting dark red solution was filtered, then carefully layered by n-hexane (3 mL), and stored for crystallization at -35 °C. After 3 days, red block crystals of compound **[K(THF)<sub>6</sub>]E** were observed in the test tube in approximately 80% yield overall.

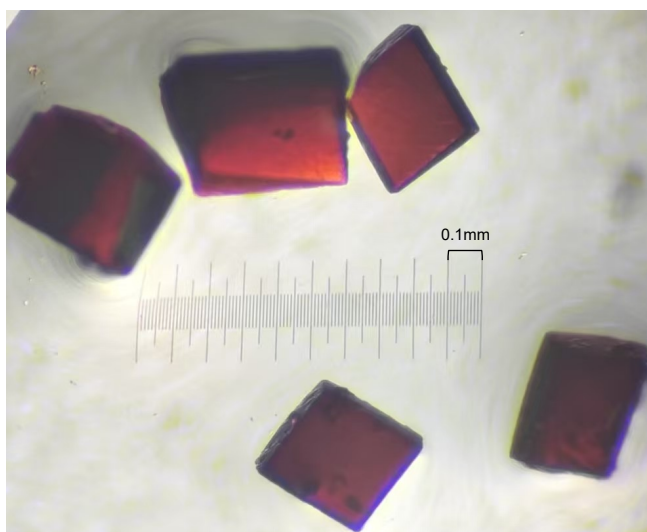

**Figure S3.** Crystal photographs of **[K(THF)<sub>6</sub>]E** taken under a light microscope.

#### 1.5 Synthesis of **[(Ge<sub>9</sub>Hyp<sub>3</sub>)Cu(Ge<sub>9</sub>Hyp<sub>3</sub>)Cu(PPh<sub>3</sub>)] (F)**

**F** has been reported in ref.[7]. In this work, 332 mg (0.1 mmol) of **[K(THF)<sub>6</sub>]E**, 21 mg (0.11 mmol) of CuI and 29 mg (0.11 mmol) of PPh<sub>3</sub> were dissolved in THF (3 mL). The reaction mixture was stirred for 6 hours at room temperature. Afterwards the THF is removed under reduced pressure. The dried reaction mixture is then extracted with n-hexane to give a dark red solution. The extract was concentrated under vacuum and then stored at -35 °C for crystallization. After 1 week, black block crystals of compound **F** were observed in the test tube in approximately 50% yield overall.

## 2 Single-Crystal X-Ray Crystallography (SCXRD)

### 2.1 Single-Crystal X-ray Diffraction

Data for **[K(crypt-222)]1**, **[K(crypt-222)]2·0.3THF** were collected from a Bruker SMART APEX-II CCD diffractometer, and **[K(THF)<sub>6</sub>]E** was collected from a Rigaku (Mo) X-ray Source with graphite monochromated Mo-K $\alpha$  ( $\lambda$  = 0.71073 Å) radiation. Multi-scan absorption correction was applied with the

SADABS program. The structure was solved by using an intrinsic phasing approach with SHELXT 2018/2 and refined by full-matrix least-squares methods against  $F^2$  using SHELXL 2018/3.<sup>[8]</sup> All non-hydrogen atoms were refined with anisotropic displacement parameters. All hydrogen atoms were refined with isotropic displacement parameters. Some of their coordinates were refined freely and some on calculated positions using a riding model with their  $U_{\text{iso}}$  values constrained to 1.5 times the  $U_{\text{eq}}$  of their pivot atoms for terminal  $\text{sp}^3$  carbon atoms and 1.2 times for all other carbon atoms. Disordered moieties were refined using bond lengths restraints and displacement parameter restraints. The relatively large tendency for disorder of the crypt-222 molecules required the application of restraints to this large number of atoms (the alternative application of the back-Fourier-transform method did not produce more reliable results). Due to the moderate quality of the crystal data of **[K(crypt-222)]1** with twinning and disorder problems, the heavily disordered solvent contribution to the overall structure factors were calculated and subtracted by back Fourier transform with the SQUEEZE algorithm in the PLATON program package,<sup>[9]</sup> and we modelled crypt-222 with plenty of restrain commands. In compound **[K(crypt-222)]2**, small residuals (not worth modelling) appear near the heavy atoms, which are common for heavy metal atoms. Crystallographic data for the structures reported in this paper have been deposited with the Cambridge Crystallographic Data Centre.<sup>[10]</sup> CCDC 2496952-2496954 contain the supplementary crystallographic data for this paper. These data can be obtained free of charge from The Cambridge Crystallographic Data Centre via [www.ccdc.cam.ac.uk/structures](http://www.ccdc.cam.ac.uk/structures). This report and the CIF file were generated using FinalCif. The crystal data and experimental parameters of the structure determinations are collected in Table S1. Supplementary views of the crystal structures are provided in Figures S4 – S9, created with Diamond 4.<sup>[11]</sup> Structural parameters are given in Tables S2 – S4.

**Table S1. Crystal data and details of the structure determination of compound **[K(crypt-222)]1**, compound **[K(crypt-222)]2**, and compound **[K(THF)<sub>6</sub>]E**.**

| Compound                                       | <b>[K(crypt-222)]1</b>                                                        | <b>[K(crypt-222)]2·0.3THF</b>                                                                     | <b>[K(THF)<sub>6</sub>]E</b>                                           |
|------------------------------------------------|-------------------------------------------------------------------------------|---------------------------------------------------------------------------------------------------|------------------------------------------------------------------------|
| Empirical formula                              | $\text{C}_{55}\text{H}_{132}\text{CuGe}_9\text{KN}_2\text{O}_6\text{Si}_{12}$ | $\text{C}_{66.25}\text{H}_{149.50}\text{Cu}_2\text{Ge}_9\text{KN}_2\text{O}_{6.31}\text{Si}_{12}$ | $\text{C}_{78}\text{H}_{210}\text{CuGe}_{18}\text{KO}_6\text{Si}_{24}$ |
| Formula weight, [g mol <sup>-1</sup> ]         | 2010.65                                                                       | 2231.90                                                                                           | 3328.25                                                                |
| Temperature/K                                  | 150                                                                           | 150                                                                                               | 150                                                                    |
| Crystal system                                 | monoclinic                                                                    | monoclinic                                                                                        | hexagonal                                                              |
| Space group                                    | $P2_1/n$                                                                      | $P2_1/c$                                                                                          | $R\bar{3}$                                                             |
| <i>a</i> /Å                                    | 18.2014(16)                                                                   | 16.4552(14)                                                                                       | 23.6847(4)                                                             |
| <i>b</i> /Å                                    | 25.5890(19)                                                                   | 24.525(2)                                                                                         | 23.6847(4)                                                             |
| <i>c</i> /Å                                    | 20.2737(17)                                                                   | 28.508(2)                                                                                         | 23.4153(6)                                                             |
| $\alpha$ /°                                    | 90                                                                            | 90                                                                                                | 90                                                                     |
| $\beta$ /°                                     | 90.100(4)                                                                     | 98.022(3)                                                                                         | 90                                                                     |
| $\gamma$ /°                                    | 90                                                                            | 90                                                                                                | 120                                                                    |
| Volume/Å <sup>3</sup>                          | 9442.6(13)                                                                    | 11392.2(17)                                                                                       | 11375.4(5)                                                             |
| <i>Z</i>                                       | 4                                                                             | 4                                                                                                 | 3                                                                      |
| $\rho_{\text{calc}}$ g/cm <sup>3</sup>         | 1.414                                                                         | 1.301                                                                                             | 1.458                                                                  |
| $\mu$ /mm <sup>-1</sup>                        | 3.275                                                                         | 2.902                                                                                             | 3.896                                                                  |
| <i>F</i> (000)                                 | 4112                                                                          | 4578                                                                                              | 5058                                                                   |
| Radiation                                      | Mo-K $\alpha$ ( $\lambda$ = 0.71073)                                          | Mo-K $\alpha$ ( $\lambda$ = 0.71073)                                                              | Mo-K $\alpha$ ( $\lambda$ = 0.71073)                                   |
| 2 $\theta$ range for data collection/°         | 4.018 to 49.418                                                               | 4.072 to 49.532                                                                                   | 5.22 to 51.994                                                         |
| Index ranges                                   | $-21 \leq h \leq 21$<br>$-30 \leq k \leq 30$<br>$-23 \leq l \leq 23$          | $-19 \leq h \leq 19$<br>$-28 \leq k \leq 28$<br>$-33 \leq l \leq 33$                              | $-29 \leq h \leq 29$ , $-29 \leq k \leq 29$ , $-28 \leq l \leq 28$     |
| Reflections collected                          | 519655                                                                        | 229785                                                                                            | 51987                                                                  |
| Independent reflections                        | 16067 [ $R_{\text{int}}$ = 0.1018, $R_{\text{sigma}}$ = 0.0303]               | 19451 [ $R_{\text{int}}$ = 0.0627, $R_{\text{sigma}}$ = 0.0286]                                   | 4974 [ $R_{\text{int}}$ = 0.0498, $R_{\text{sigma}}$ = 0.0235]         |
| Data/restraints/parameters                     | 16067/586/984                                                                 | 19451/0/911                                                                                       | 4974/0/233                                                             |
| Goodness-of-fit on $F^2$                       | 1.039                                                                         | 1.098                                                                                             | 1.039                                                                  |
| Final <i>R</i> indexes [ $I \geq 2\sigma(I)$ ] | $R_1$ = 0.0242, $wR_2$ =                                                      | $R_1$ = 0.0423, $wR_2$ =                                                                          | $R_1$ = 0.0399, $wR_2$ =                                               |

|                                                |                                  |                                  |                                  |
|------------------------------------------------|----------------------------------|----------------------------------|----------------------------------|
|                                                | 0.0617                           | 0.1158                           | 0.0912                           |
| Final R indexes [all data]                     | $R_1 = 0.0271$ , $wR_2 = 0.0632$ | $R_1 = 0.0514$ , $wR_2 = 0.1198$ | $R_1 = 0.0494$ , $wR_2 = 0.0952$ |
| Largest diff. peak/hole / $e \text{ \AA}^{-3}$ | 0.50/-0.29                       | 1.22/-0.51                       | 0.51/-0.37                       |
| CCDC deposition number                         | 2496952                          | 2496953                          | 2496954                          |

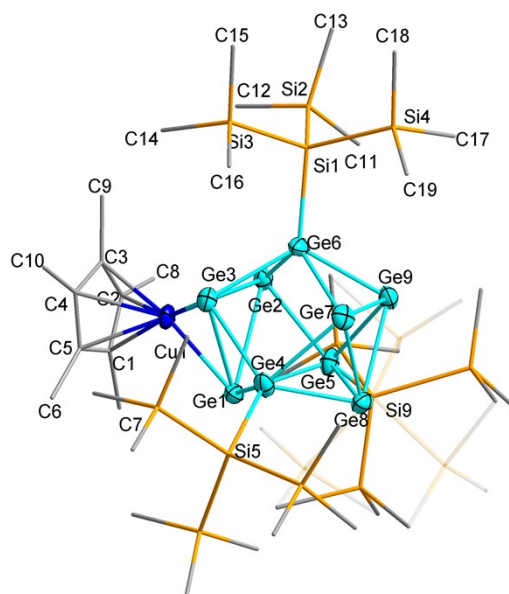

**Figure S4.** Molecular structure of the anion **1** with full labelling scheme (except for C, Si atoms). Thermal ellipsoids of Ge/Cu atoms are shown at 50% probability. H atoms are omitted for clarity.

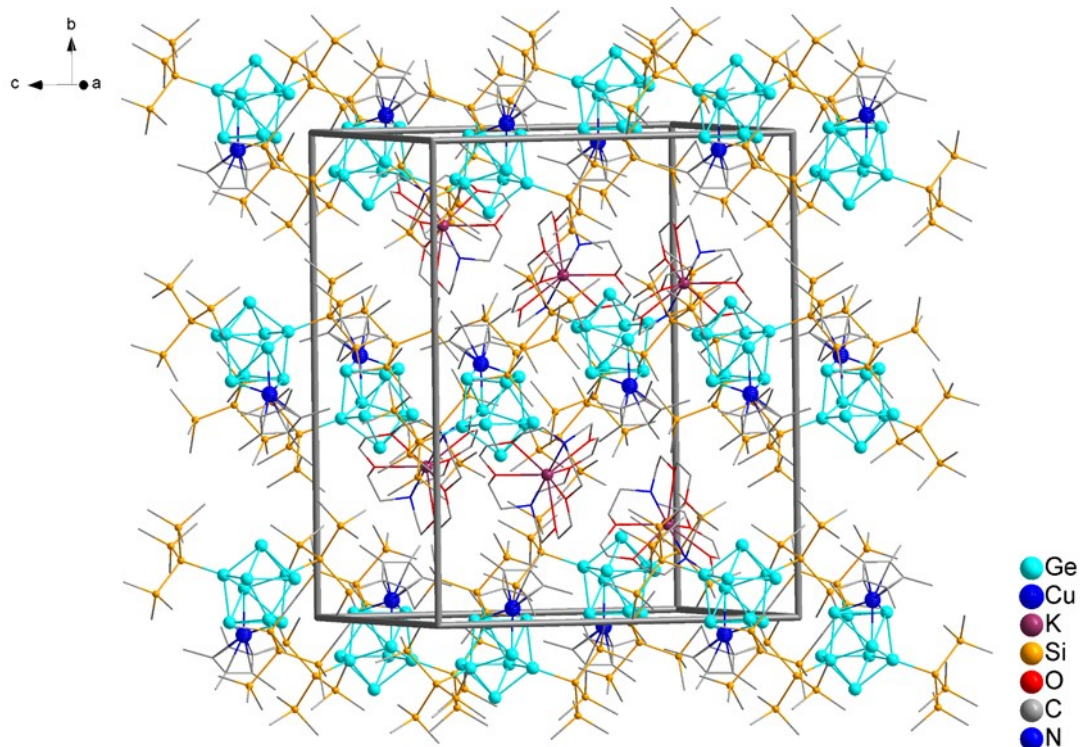

**Figure S5.** Unit cell view of compound  $[K(\text{crypt-222})]1$ . H atoms are omitted for clarity.

**Table S2.** Selected interatomic distances (in Å) and bond angles (in degrees) of the experimental structures of the anion in  $[K(\text{crypt-222})]1$ .

| Atom-Atom | Distance (exp) | Atom-Atom | Distance (exp) |
|-----------|----------------|-----------|----------------|
|-----------|----------------|-----------|----------------|

|         |          |         |           |
|---------|----------|---------|-----------|
| Ge1–Ge2 | 2.907(2) | Ge5–Ge8 | 2.556(2)  |
| Ge1–Ge3 | 2.885(2) | Ge5–Ge9 | 2.556(2)  |
| Ge1–Ge4 | 2.522(2) | Ge5–Si9 | 2.374(5)  |
| Ge1–Ge5 | 2.513(2) | Ge6–Ge7 | 2.551(2)  |
| Ge1–Cu1 | 2.467(2) | Ge6–Ge9 | 2.548(2)  |
| Ge2–Ge3 | 2.883(2) | Ge6–Si1 | 2.377(4)  |
| Ge2–Ge5 | 2.512(2) | Ge7–Ge8 | 2.651(2)  |
| Ge2–Ge6 | 2.527(2) | Ge7–Ge9 | 2.649(2)  |
| Ge2–Cu1 | 2.468(2) | Ge8–Ge9 | 2.665(2)  |
| Ge3–Ge4 | 2.524(2) | Cu1–C1  | 2.224(19) |
| Ge3–Ge6 | 2.520(2) | Cu1–C2  | 2.239(17) |
| Ge3–Cu1 | 2.450(2) | Cu1–C3  | 2.242(19) |
| Ge4–Ge7 | 2.555(2) | Cu1–C4  | 2.242(16) |
| Ge4–Ge8 | 2.551(2) | Cu1–C5  | 2.215(17) |
| Ge4–Si5 | 2.377(4) |         |           |

| Atom-Atom-Atom | Angles (exp) | Atom-Atom-Atom | Angles (exp) |
|----------------|--------------|----------------|--------------|
| Ge3–Ge1–Ge2    | 59.70(6)     | Ge3–Ge6–Ge7    | 87.96(7)     |
| Ge4–Ge1–Ge2    | 96.76(7)     | Ge3–Ge6–Ge9    | 120.83(8)    |
| Ge4–Ge1–Ge3    | 55.16(6)     | Ge9–Ge6–Ge7    | 62.58(6)     |
| Ge5–Ge1–Ge2    | 54.62(6)     | Si1–Ge6–Ge2    | 116.27(14)   |
| Ge5–Ge1–Ge3    | 99.11(7)     | Si1–Ge6–Ge3    | 122.98(13)   |
| Ge5–Ge1–Ge4    | 91.57(7)     | Si1–Ge6–Ge7    | 121.95(13)   |
| Cu1–Ge1–Ge2    | 53.94(6)     | Si1–Ge6–Ge9    | 116.10(13)   |
| Cu1–Ge1–Ge3    | 53.80(6)     | Ge4–Ge7–Ge8    | 58.63(6)     |
| Cu1–Ge1–Ge4    | 108.31(8)    | Ge4–Ge7–Ge9    | 99.66(7)     |
| Cu1–Ge1–Ge5    | 107.23(8)    | Ge6–Ge7–Ge4    | 86.60(7)     |
| Ge3–Ge2–Ge1    | 59.77(6)     | Ge6–Ge7–Ge8    | 99.84(7)     |
| Ge5–Ge2–Ge1    | 54.69(6)     | Ge6–Ge7–Ge9    | 58.66(6)     |
| Ge5–Ge2–Ge3    | 99.20(7)     | Ge9–Ge7–Ge8    | 60.37(6)     |
| Ge5–Ge2–Ge6    | 91.70(7)     | Ge4–Ge8–Ge5    | 89.94(7)     |
| Ge6–Ge2–Ge1    | 96.78(7)     | Ge4–Ge8–Ge7    | 58.80(6)     |
| Ge6–Ge2–Ge3    | 55.04(6)     | Ge4–Ge8–Ge9    | 99.35(7)     |
| Cu1–Ge2–Ge1    | 53.89(6)     | Ge5–Ge8–Ge7    | 101.88(7)    |
| Cu1–Ge2–Ge3    | 53.82(6)     | Ge5–Ge8–Ge9    | 58.58(6)     |
| Cu1–Ge2–Ge5    | 107.24(8)    | Ge7–Ge8–Ge9    | 59.76(6)     |
| Cu1–Ge2–Ge6    | 108.21(8)    | Ge5–Ge9–Ge7    | 101.95(7)    |
| Ge2–Ge3–Ge1    | 60.53(5)     | Ge5–Ge9–Ge8    | 58.58(6)     |
| Ge4–Ge3–Ge1    | 55.09(6)     | Ge6–Ge9–Ge5    | 90.19(7)     |
| Ge4–Ge3–Ge2    | 97.31(7)     | Ge6–Ge9–Ge7    | 58.76(6)     |
| Ge6–Ge3–Ge1    | 97.51(7)     | Ge6–Ge9–Ge8    | 99.55(7)     |
| Ge6–Ge3–Ge2    | 55.29(6)     | Ge7–Ge9–Ge8    | 59.86(6)     |
| Ge6–Ge3–Ge4    | 87.96(7)     | Ge1–Cu1–Ge2    | 72.17(7)     |
| Cu1–Ge3–Ge1    | 54.35(6)     | Ge3–Cu1–Ge1    | 71.85(7)     |
| Cu1–Ge3–Ge2    | 54.41(6)     | Ge3–Cu1–Ge2    | 71.77(7)     |
| Cu1–Ge3–Ge4    | 108.79(8)    | C1–Cu1–Ge1     | 105.7(5)     |
| Cu1–Ge3–Ge6    | 109.05(8)    | C1–Cu1–Ge2     | 127.5(6)     |
| Ge1–Ge4–Ge3    | 69.75(6)     | C1–Cu1–Ge3     | 159.6(6)     |
| Ge1–Ge4–Ge7    | 120.71(8)    | C1–Cu1–C2      | 36.0(7)      |
| Ge1–Ge4–Ge8    | 82.92(7)     | C1–Cu1–C3      | 58.8(7)      |
| Ge3–Ge4–Ge7    | 87.78(7)     | C1–Cu1–C4      | 60.5(7)      |
| Ge3–Ge4–Ge8    | 120.87(8)    | C2–Cu1–Ge1     | 130.0(6)     |
| Ge8–Ge4–Ge7    | 62.57(6)     | C2–Cu1–Ge2     | 104.6(5)     |



|             |            |            |          |
|-------------|------------|------------|----------|
| Si5–Ge4–Ge1 | 116.97(14) | C2–Cu1–Ge3 | 156.7(6) |
| Si5–Ge4–Ge3 | 122.33(13) | C2–Cu1–C3  | 34.3(7)  |
| Si5–Ge4–Ge7 | 121.30(14) | C2–Cu1–C4  | 59.3(7)  |
| Si5–Ge4–Ge8 | 116.77(13) | C3–Cu1–Ge1 | 163.6(6) |
| Ge1–Ge5–Ge8 | 82.98(7)   | C3–Cu1–Ge2 | 112.0(5) |
| Ge1–Ge5–Ge9 | 118.61(8)  | C3–Cu1–Ge3 | 124.5(6) |
| Ge2–Ge5–Ge1 | 70.69(6)   | C3–Cu1–C4  | 35.5(8)  |
| Ge2–Ge5–Ge8 | 118.68(8)  | C4–Cu1–Ge1 | 144.5(6) |
| Ge2–Ge5–Ge9 | 82.79(7)   | C4–Cu1–Ge2 | 143.0(6) |
| Ge8–Ge5–Ge9 | 62.85(6)   | C4–Cu1–Ge3 | 109.3(5) |
| Si9–Ge5–Ge1 | 123.21(16) | C5–Cu1–Ge1 | 112.4(5) |
| Si9–Ge5–Ge2 | 122.61(16) | C5–Cu1–Ge2 | 164.3(6) |
| Si9–Ge5–Ge8 | 118.25(15) | C5–Cu1–Ge3 | 123.8(6) |
| Si9–Ge5–Ge9 | 117.83(15) | C5–Cu1–C1  | 37.3(8)  |
| Ge2–Ge6–Ge7 | 120.55(8)  | C5–Cu1–C2  | 60.5(7)  |
| Ge2–Ge6–Ge9 | 82.63(7)   | C5–Cu1–C3  | 59.4(7)  |
| Ge3–Ge6–Ge2 | 69.68(6)   | C5–Cu1–C4  | 36.0(7)  |

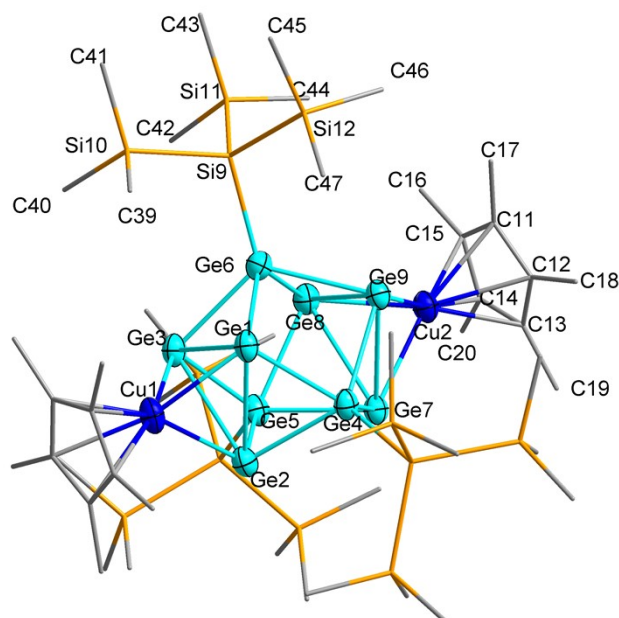

**Figure S6.** Molecular structure of the anion **2** with full labelling scheme (except for C, Si atoms). Thermal ellipsoids of Ge/Cu atoms are shown at 50% probability. H atoms are omitted for clarity.

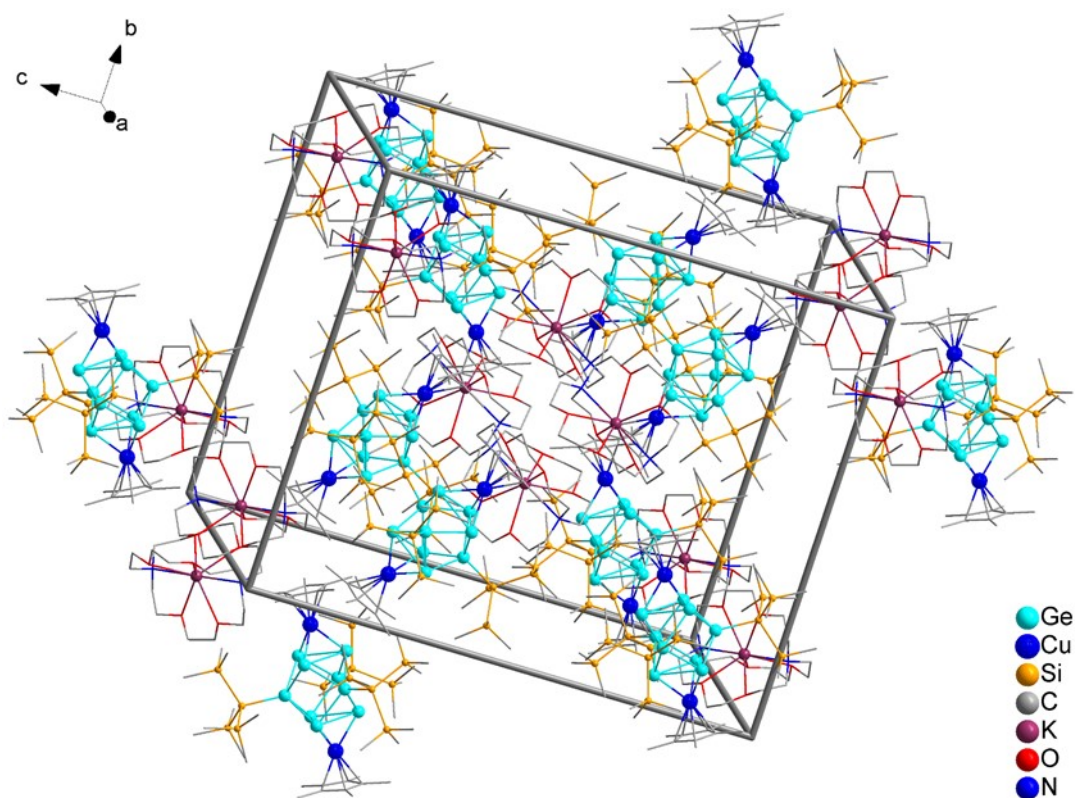

**Figure S7.** Unit cell view of compound  $[\text{K}(\text{crypt-222})]_2 \cdot 0.3\text{THF}$ . H atoms are omitted for clarity.

**Table S3.** Selected interatomic distances (in Å) and bond angles (in degrees) of the experimental structures of the anion in  $[\text{K}(\text{crypt-222})]_2$ .

| Atom-Atom      | Distance (exp) | Atom-Atom      | Distance (exp) |
|----------------|----------------|----------------|----------------|
| Ge1–Ge2        | 2.8794(8)      | Ge6–Ge9        | 2.5572(7)      |
| Ge1–Ge3        | 2.8769(7)      | Ge6–Si9        | 2.3933(15)     |
| Ge1–Ge4        | 2.5343(7)      | Ge7–Ge8        | 2.8446(7)      |
| Ge1–Ge6        | 2.5391(7)      | Ge7–Ge9        | 2.8479(7)      |
| Ge1–Cu1        | 2.4675(8)      | Ge7–Cu2        | 2.4789(8)      |
| Ge2–Ge3        | 2.8724(8)      | Ge8–Ge9        | 2.8327(7)      |
| Ge2–Ge4        | 2.5340(7)      | Ge8–Cu2        | 2.4846(8)      |
| Ge2–Ge5        | 2.5276(7)      | Ge9–Cu2        | 2.4883(7)      |
| Ge2–Cu1        | 2.4564(8)      | Cu1–C1         | 2.328(5)       |
| Ge3–Ge5        | 2.5414(7)      | Cu1–C2         | 2.315(5)       |
| Ge3–Ge6        | 2.5427(7)      | Cu1–C3         | 2.241(5)       |
| Ge3–Cu1        | 2.5006(8)      | Cu1–C4         | 2.210(5)       |
| Ge4–Ge7        | 2.5438(7)      | Cu1–C5         | 2.275(5)       |
| Ge4–Ge9        | 2.5441(7)      | Cu2–C11        | 2.273(5)       |
| Ge4–Si1        | 2.3858(14)     | Cu2–C12        | 2.287(5)       |
| Ge5–Ge7        | 2.5450(7)      | Cu2–C13        | 2.277(5)       |
| Ge5–Ge8        | 2.5424(8)      | Cu2–C14        | 2.255(5)       |
| Ge5–Si5        | 2.3865(14)     | Cu2–C15        | 2.261(5)       |
| Ge6–Ge8        | 2.5415(7)      |                |                |
| Atom-Atom-Atom | Angles (exp)   | Atom-Atom-Atom | Angles (exp)   |
| Ge3–Ge1–Ge2    | 59.867(18)     | Ge6–Ge8–Ge7    | 98.81(2)       |
| Ge4–Ge1–Ge2    | 55.375(19)     | Ge6–Ge8–Ge9    | 56.514(18)     |
| Ge4–Ge1–Ge3    | 97.76(2)       | Ge9–Ge8–Ge7    | 60.215(18)     |
| Ge4–Ge1–Ge6    | 89.49(2)       | Cu2–Ge8–Ge5    | 109.90(3)      |



|             |            |             |            |
|-------------|------------|-------------|------------|
| Ge6–Ge1–Ge2 | 97.85(2)   | Cu2–Ge8–Ge6 | 110.92(3)  |
| Ge6–Ge1–Ge3 | 55.578(19) | Cu2–Ge8–Ge7 | 54.94(2)   |
| Cu1–Ge1–Ge2 | 54.03(2)   | Cu2–Ge8–Ge9 | 55.34(2)   |
| Cu1–Ge1–Ge3 | 55.15(2)   | Ge4–Ge9–Ge6 | 88.87(2)   |
| Cu1–Ge1–Ge4 | 108.38(3)  | Ge4–Ge9–Ge7 | 55.958(18) |
| Cu1–Ge1–Ge6 | 109.97(3)  | Ge4–Ge9–Ge8 | 97.93(2)   |
| Ge3–Ge2–Ge1 | 60.023(19) | Ge6–Ge9–Ge7 | 98.35(2)   |
| Ge4–Ge2–Ge1 | 55.385(19) | Ge6–Ge9–Ge8 | 55.986(19) |
| Ge4–Ge2–Ge3 | 97.89(2)   | Ge8–Ge9–Ge7 | 60.100(18) |
| Ge5–Ge2–Ge1 | 98.18(2)   | Cu2–Ge9–Ge4 | 109.93(3)  |
| Ge5–Ge2–Ge3 | 55.710(19) | Cu2–Ge9–Ge6 | 110.28(3)  |
| Ge5–Ge2–Ge4 | 89.70(2)   | Cu2–Ge9–Ge7 | 54.86(2)   |
| Cu1–Ge2–Ge1 | 54.39(2)   | Cu2–Ge9–Ge8 | 55.21(2)   |
| Cu1–Ge2–Ge3 | 55.31(2)   | Ge1–Cu1–Ge3 | 70.77(2)   |
| Cu1–Ge2–Ge4 | 108.75(3)  | Ge2–Cu1–Ge1 | 71.58(2)   |
| Cu1–Ge2–Ge5 | 110.17(3)  | Ge2–Cu1–Ge3 | 70.82(2)   |
| Ge2–Ge3–Ge1 | 60.110(18) | C1–Cu1–Ge1  | 116.64(14) |
| Ge5–Ge3–Ge1 | 97.92(2)   | C1–Cu1–Ge2  | 116.10(15) |
| Ge5–Ge3–Ge2 | 55.256(19) | C1–Cu1–Ge3  | 170.72(13) |
| Ge5–Ge3–Ge6 | 89.71(2)   | C2–Cu1–Ge1  | 148.83(14) |
| Ge6–Ge3–Ge1 | 55.460(19) | C2–Cu1–Ge2  | 105.32(14) |
| Ge6–Ge3–Ge2 | 97.94(2)   | C2–Cu1–Ge3  | 138.88(14) |
| Cu1–Ge3–Ge1 | 54.08(2)   | C2–Cu1–C1   | 35.4(2)    |
| Cu1–Ge3–Ge2 | 53.87(2)   | C3–Cu1–Ge1  | 163.64(15) |
| Cu1–Ge3–Ge5 | 108.31(3)  | C3–Cu1–Ge2  | 124.73(15) |
| Cu1–Ge3–Ge6 | 108.79(3)  | C3–Cu1–Ge3  | 111.19(14) |
| Ge1–Ge4–Ge7 | 122.13(3)  | C3–Cu1–C1   | 60.05(19)  |
| Ge1–Ge4–Ge9 | 84.26(2)   | C3–Cu1–C2   | 36.17(19)  |
| Ge2–Ge4–Ge1 | 69.24(2)   | C3–Cu1–C5   | 61.19(18)  |
| Ge2–Ge4–Ge7 | 83.60(2)   | C4–Cu1–Ge1  | 126.45(14) |
| Ge2–Ge4–Ge9 | 121.91(3)  | C4–Cu1–Ge2  | 161.89(14) |
| Ge7–Ge4–Ge9 | 68.08(2)   | C4–Cu1–Ge3  | 111.11(14) |
| Si1–Ge4–Ge1 | 119.35(4)  | C4–Cu1–C1   | 60.3(2)    |
| Si1–Ge4–Ge2 | 116.07(4)  | C4–Cu1–C2   | 60.8(2)    |
| Si1–Ge4–Ge7 | 118.44(4)  | C4–Cu1–C3   | 37.2(2)    |
| Si1–Ge4–Ge9 | 121.99(4)  | C4–Cu1–C5   | 36.84(19)  |
| Ge2–Ge5–Ge3 | 69.03(2)   | C5–Cu1–Ge1  | 106.15(13) |
| Ge2–Ge5–Ge7 | 83.70(2)   | C5–Cu1–Ge2  | 148.72(16) |
| Ge2–Ge5–Ge8 | 121.31(3)  | C5–Cu1–Ge3  | 139.24(16) |
| Ge3–Ge5–Ge7 | 121.74(2)  | C5–Cu1–C1   | 35.6(2)    |
| Ge3–Ge5–Ge8 | 83.58(2)   | C5–Cu1–C2   | 59.9(2)    |
| Ge8–Ge5–Ge7 | 67.99(2)   | Ge7–Cu2–Ge8 | 69.94(2)   |
| Si5–Ge5–Ge2 | 123.61(4)  | Ge7–Cu2–Ge9 | 69.97(2)   |
| Si5–Ge5–Ge3 | 117.74(4)  | Ge8–Cu2–Ge9 | 69.45(2)   |
| Si5–Ge5–Ge7 | 120.26(4)  | C11–Cu2–Ge7 | 164.35(14) |
| Si5–Ge5–Ge8 | 115.06(4)  | C11–Cu2–Ge8 | 124.35(14) |
| Ge1–Ge6–Ge3 | 68.96(2)   | C11–Cu2–Ge9 | 107.31(13) |
| Ge1–Ge6–Ge8 | 121.25(3)  | C11–Cu2–C12 | 36.09(18)  |
| Ge1–Ge6–Ge9 | 83.90(2)   | C11–Cu2–C13 | 60.94(18)  |
| Ge3–Ge6–Ge9 | 121.40(3)  | C12–Cu2–Ge7 | 129.21(13) |
| Ge8–Ge6–Ge3 | 83.57(2)   | C12–Cu2–Ge8 | 160.34(13) |
| Ge8–Ge6–Ge9 | 67.50(2)   | C12–Cu2–Ge9 | 110.17(13) |

|             |            |             |            |
|-------------|------------|-------------|------------|
| Si9–Ge6–Ge1 | 119.12(4)  | C13–Cu2–Ge7 | 110.48(13) |
| Si9–Ge6–Ge3 | 121.11(4)  | C13–Cu2–Ge8 | 150.74(13) |
| Si9–Ge6–Ge8 | 119.57(4)  | C13–Cu2–Ge9 | 139.38(13) |
| Si9–Ge6–Ge9 | 117.48(4)  | C13–Cu2–C12 | 36.37(18)  |
| Ge4–Ge7–Ge5 | 89.09(2)   | C14–Cu2–Ge7 | 121.37(14) |
| Ge4–Ge7–Ge8 | 97.63(2)   | C14–Cu2–Ge8 | 116.62(14) |
| Ge4–Ge7–Ge9 | 55.967(19) | C14–Cu2–Ge9 | 168.02(13) |
| Ge5–Ge7–Ge8 | 55.959(19) | C14–Cu2–C11 | 60.71(18)  |
| Ge5–Ge7–Ge9 | 98.28(2)   | C14–Cu2–C12 | 60.39(18)  |
| Ge8–Ge7–Ge9 | 59.685(18) | C14–Cu2–C13 | 36.62(19)  |
| Cu2–Ge7–Ge4 | 110.24(3)  | C14–Cu2–C15 | 36.28(19)  |
| Cu2–Ge7–Ge5 | 110.00(3)  | C15–Cu2–Ge7 | 153.68(14) |
| Cu2–Ge7–Ge8 | 55.13(2)   | C15–Cu2–Ge8 | 105.03(14) |
| Cu2–Ge7–Ge9 | 55.171(19) | C15–Cu2–Ge9 | 133.90(14) |
| Ge5–Ge8–Ge7 | 56.046(19) | C15–Cu2–C11 | 36.43(19)  |
| Ge5–Ge8–Ge9 | 98.73(2)   | C15–Cu2–C12 | 60.25(18)  |
| Ge6–Ge8–Ge5 | 89.72(2)   | C15–Cu2–C13 | 60.89(18)  |

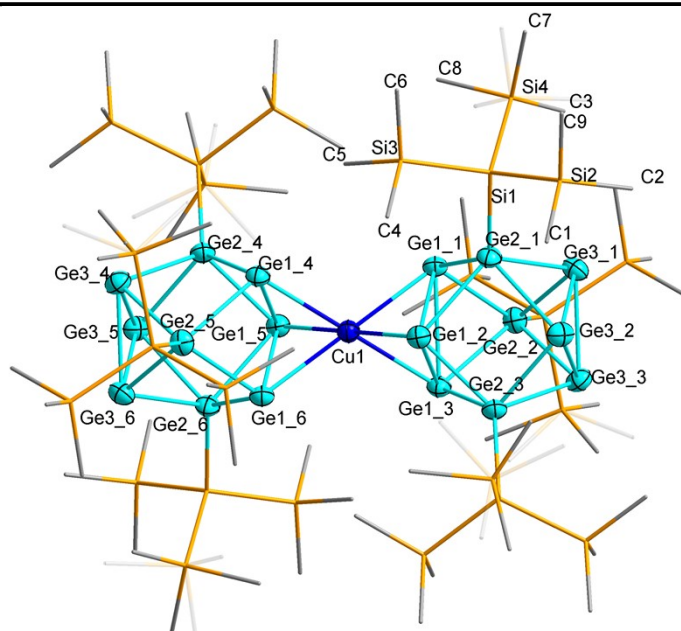

**Figure S8.** Molecular structure of the anion **E** with full labelling scheme (except for C, Si atoms). Thermal ellipsoids of Ge/Cu atoms are shown at 50% probability. H atoms are omitted for clarity.

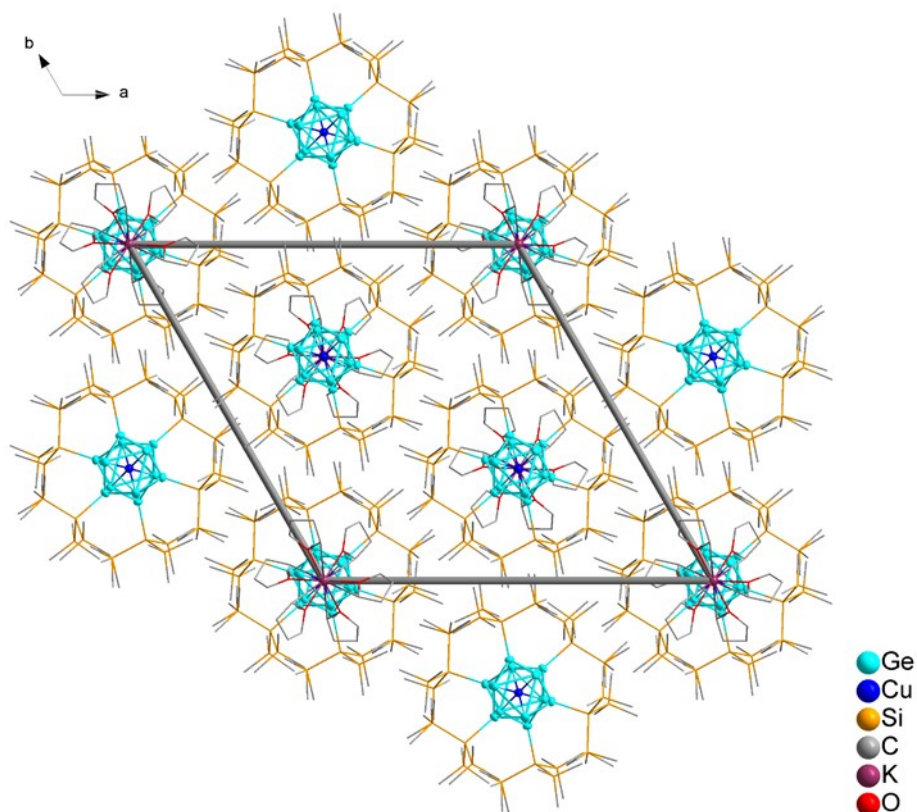

**Figure S9.** Unit cell view of compound  $[\text{K}(\text{THF})_6]\text{E}$ . H atoms are omitted for clarity.

**Table S4.** Selected interatomic distances (in Å) and bond angles (in degrees) of the experimental structures of the anion in  $[\text{K}(\text{THF})_6]\text{E}$ .

| Atom-Atom       | Distance (exp) | Atom-Atom       | Distance (exp) |
|-----------------|----------------|-----------------|----------------|
| Ge1–Ge1_1       | 2.8517(6)      | Ge3–Ge3_1       | 2.6349(7)      |
| Ge1–Ge1_2       | 2.8517(6)      | Ge2–Ge3         | 2.5520(5)      |
| Ge1–Ge2         | 2.5192(5)      | Ge2–Ge3_1       | 2.5497(5)      |
| Ge1–Ge2_2       | 2.5217(5)      | Ge2–Si1         | 2.3792(10)     |
| Ge1–Cu1         | 2.5762(4)      | Ge3–Ge3_2       | 2.6348(7)      |
| Atom-Atom-Atom  | Angles (exp)   | Atom-Atom-Atom  | Angles (exp)   |
| Ge1_1–Ge1–Ge1_2 | 60.0           | Ge2–Ge3–Ge3_1   | 58.862(16)     |
| Ge2_2–Ge1–Ge1_1 | 98.838(12)     | Ge2_2–Ge3–Ge3_1 | 101.269(14)    |
| Ge2_2–Ge1–Ge1_2 | 55.506(14)     | Ge2_2–Ge3–Ge3_2 | 58.950(16)     |
| Ge2–Ge1–Ge1_1   | 55.588(14)     | Ge2–Ge3–Ge3_2   | 101.205(14)    |
| Ge2–Ge1–Ge1_2   | 98.896(12)     | Ge3_2–Ge3–Ge3_1 | 60.0           |
| Ge2–Ge1–Ge2_2   | 92.09(2)       | Ge1–Cu1–Ge1_3   | 112.787(13)    |
| Ge2_2–Ge1–Cu1   | 110.430(16)    | Ge1_2–Cu1–Ge1_1 | 67.211(13)     |
| Ge2–Ge1–Cu1     | 110.510(15)    | Ge1–Cu1–Ge1_1   | 67.212(13)     |
| Cu1–Ge1–Ge1_1   | 56.394(6)      | Ge1_4–Cu1–Ge1_1 | 112.790(13)    |
| Cu1–Ge1–Ge1_2   | 56.394(6)      | Ge1_4–Cu1–Ge1_2 | 112.787(13)    |
| Ge1–Ge2–Ge1_1   | 68.905(19)     | Ge1–Cu1–Ge1_2   | 67.212(13)     |
| Ge1_1–Ge2–Ge3   | 118.008(18)    | Ge1_5–Cu1–Ge1_4 | 67.213(13)     |
| Ge1_1–Ge2–Ge3_1 | 83.448(17)     | Ge1_4–Cu1–Ge1_3 | 67.211(13)     |
| Ge1–Ge2–Ge3_1   | 118.099(18)    | Ge1_5–Cu1–Ge1_3 | 67.212(13)     |
| Ge1–Ge2–Ge3     | 83.452(16)     | Ge1_2–Cu1–Ge1_3 | 112.787(13)    |
| Ge3_1–Ge2–Ge3   | 62.19(2)       | Ge1–Cu1–Ge1_4   | 180.0          |
| Si1–Ge2–Ge1_1   | 122.78(3)      | Ge1_1–Cu1–Ge1_3 | 180.0          |

|               |           |                 |             |
|---------------|-----------|-----------------|-------------|
| Si1–Ge2–Ge1   | 127.63(3) | Ge1_5–Cu1–Ge1   | 112.788(13) |
| Si1–Ge2–Ge3   | 118.17(3) | Ge1_5–Cu1–Ge1_2 | 179.999(14) |
| Si1–Ge2–Ge3_1 | 114.05(3) | Ge1_5–Cu1–Ge1_1 | 112.791(13) |
| Ge2_2–Ge3–Ge2 | 90.68(2)  |                 |             |

### 3 Energy-Dispersive X-Ray Spectroscopy (EDS)

EDS analysis of single crystal of compound [K(crypt-222)]**1**, [K(crypt-222)]**2**·0.3THF and [K(THF)<sub>6</sub>]**E** were carried out using an Oxford X-Max 80 instrument (UK). The spectra are shown in Figures S10-S12. Several measurements produced unreasonably large values for the % K and Si. After excluding K and Si from the calculations, the results obtained closely matched the expected atomic ratios. We believe that accumulation of K and Si at the crystal surface upon exposure to air is responsible for the anomalous results. This is observed commonly for very these very air-sensitive compounds.

**Table S5.** EDS analysis of [K(crypt-222)]**1**, [K(crypt-222)]**2** and [K(THF)<sub>6</sub>]**E**.

| [K(crypt-222)] <b>1</b>         |        |       |        |                        |                        |                    |
|---------------------------------|--------|-------|--------|------------------------|------------------------|--------------------|
| Element                         | Mass % | Norm. | Atom % | Abs. error % (1 sigma) | Element ratio observed | Element ratio calc |
| Si                              | 52.90  |       | 72.33  | 1.06                   | 33.83                  | 12.00              |
| K                               | 5.14   |       | 5.05   | 0.34                   | 2.36                   | 1.00               |
| Cu                              | 5.59   |       | 3.38   | 0.56                   | 1.58                   | 1.00               |
| Ge                              | 36.37  |       | 19.24  | 1.18                   | 9.00                   | 9.00               |
| Total                           | 100.00 |       | 100.00 |                        |                        |                    |
| [K(crypt-222)] <b>2</b> ·0.3THF |        |       |        |                        |                        |                    |
| Element                         | Mass % | Norm. | Atom % | Abs. error % (1 sigma) | Element ratio observed | Element ratio calc |
| Si                              | 26.15  |       | 46.26  | 0.6                    | 10.52                  | 12.00              |
| K                               | 3.33   |       | 4.24   | 0.24                   | 0.96                   | 1.00               |
| Cu                              | 12.70  |       | 9.93   | 0.60                   | 2.26                   | 2.00               |
| Ge                              | 57.82  |       | 39.57  | 0.91                   | 9.00                   | 9.00               |
| Total                           | 100.00 |       | 100.00 |                        |                        |                    |
| [K(THF) <sub>6</sub> ] <b>E</b> |        |       |        |                        |                        |                    |
| Element                         | Mass % | Norm. | Atom % | Abs. error % (1 sigma) | Element ratio observed | Element ratio calc |
| Si                              | 38.09  |       | 0.38   | 61.15                  | 30.68                  | 24.00              |
| K                               | 0.09   |       | 0.08   | 0.11                   | 0.06                   | 1.00               |
| Cu                              | 4.04   |       | 0.22   | 2.86                   | 1.43                   | 1.00               |
| Ge                              | 57.78  |       | 0.42   | 35.88                  | 18.00                  | 18.00              |
| Total                           | 100.00 |       | 100.00 |                        |                        |                    |

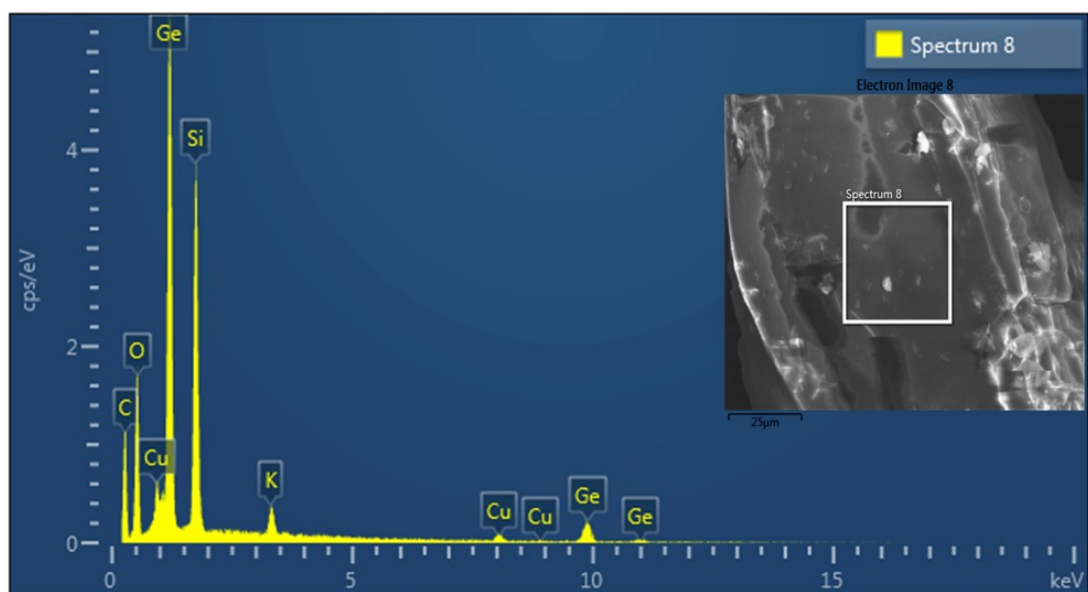

**Figure S10.** EDS analysis of [K(crypt-222)]1.

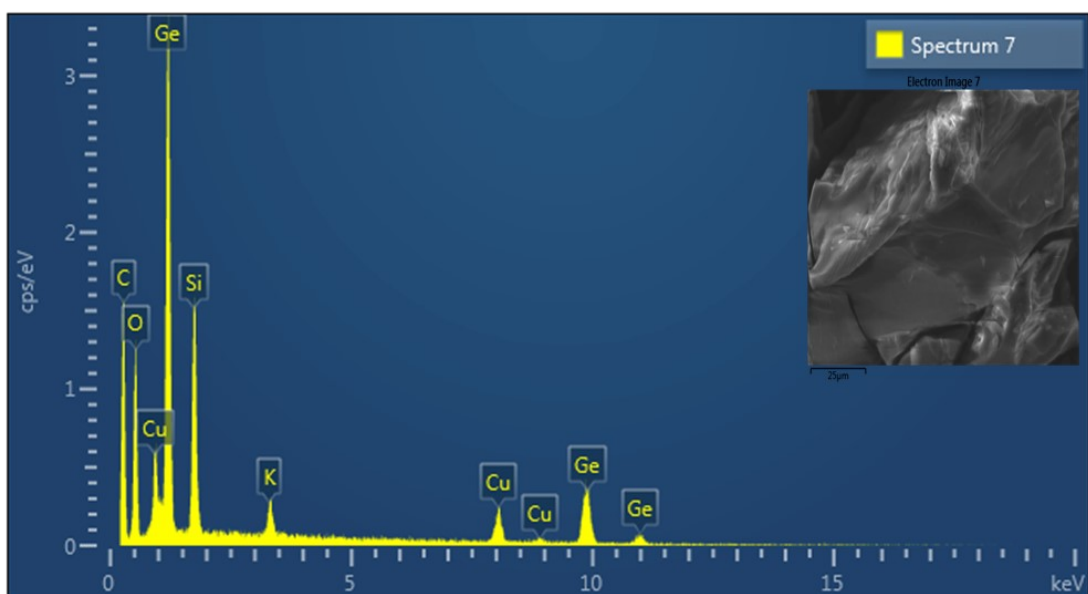

**Figure S11.** EDS analysis of [K(crypt-222)]2·0.3THF.

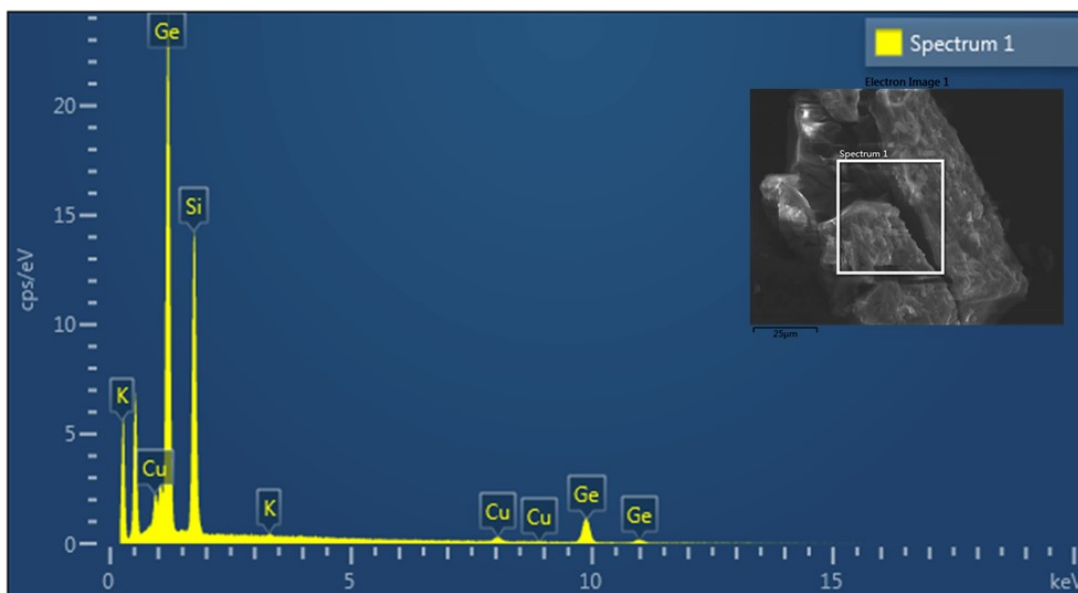

**Figure S12.** EDS analysis of  $[K(THF)_6]E$ .

#### 4 NMR Spectra

$^1H$  NMR,  $^{13}C$  NMR and  $^{29}Si$  NMR spectra recorded from solutions of single-crystals of compounds  $[K(crypt-222)]1$  and  $[K(crypt-222)]2 \cdot 0.3THF$  are provided in Figures S13 –S18.

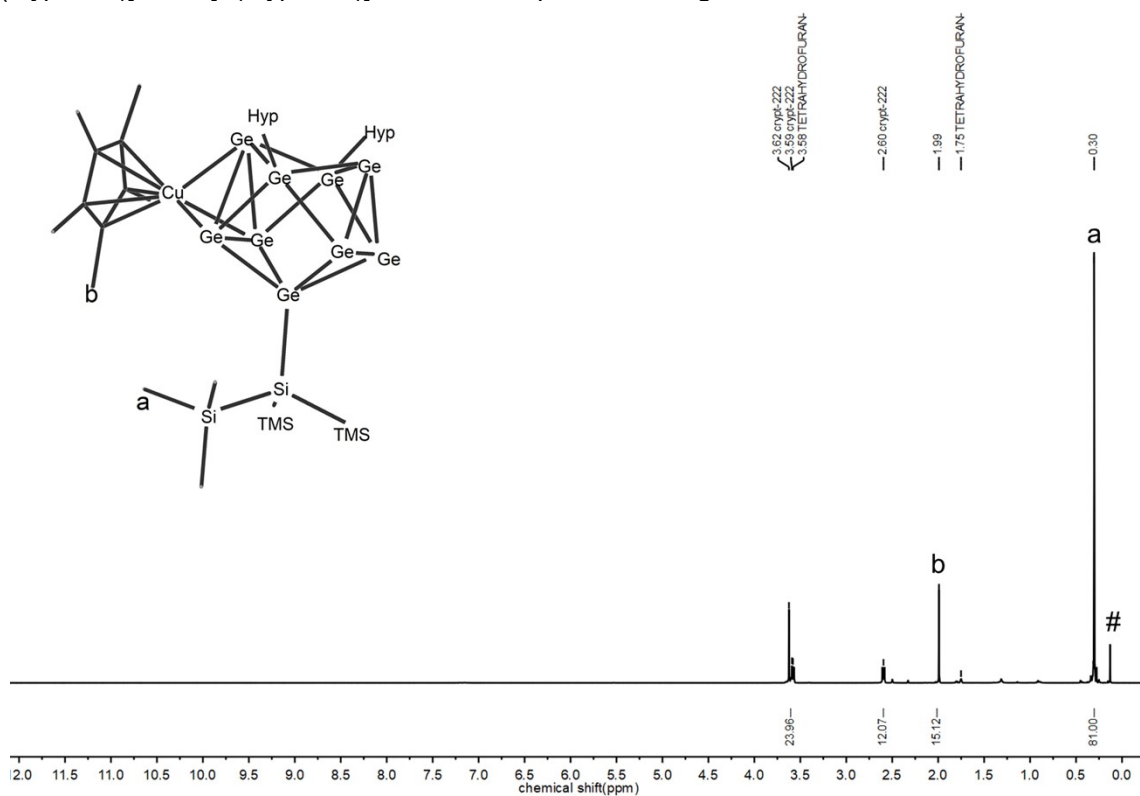

**Figure S13.**  $^1H$  NMR spectrum (THF- $d_8$ ) of  $[K(crypt-222)]1$ . Signal marked with # is caused by silicon grease.



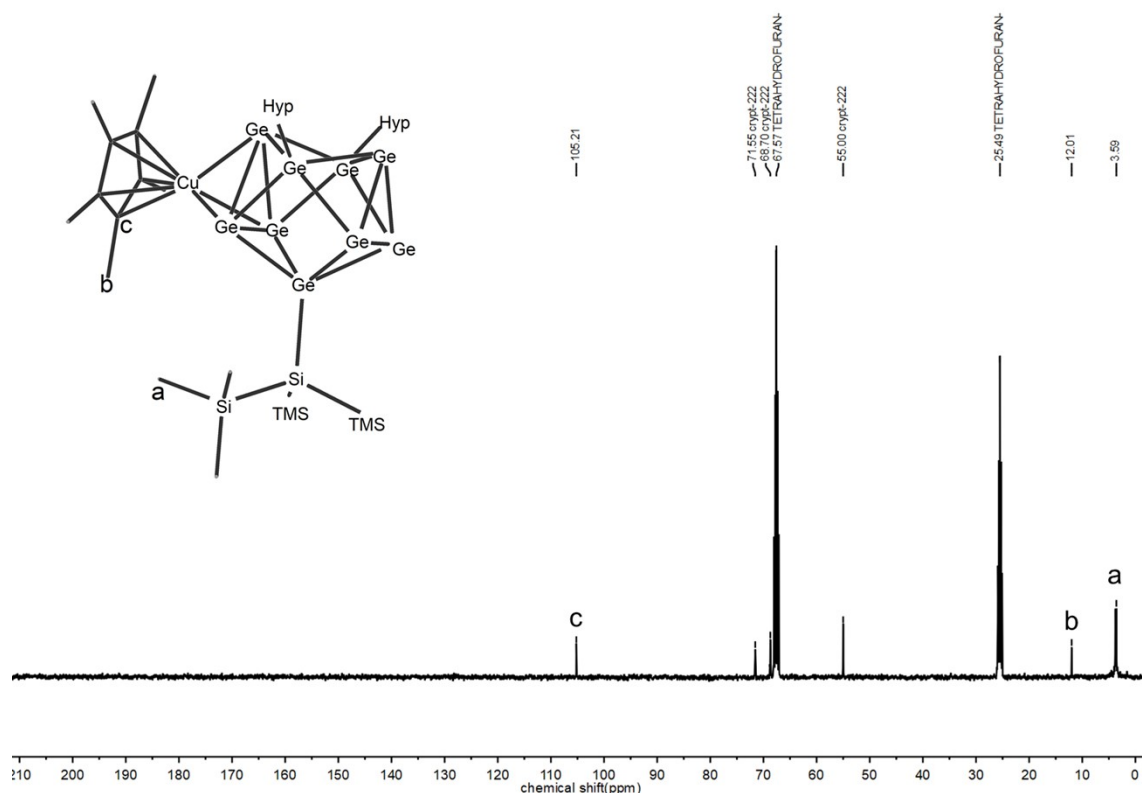

**Figure S14.**  $^{13}\text{C}$  NMR spectrum (THF- $d_8$ ) of  $[\text{K}(\text{crypt-222})]\mathbf{1}$ .

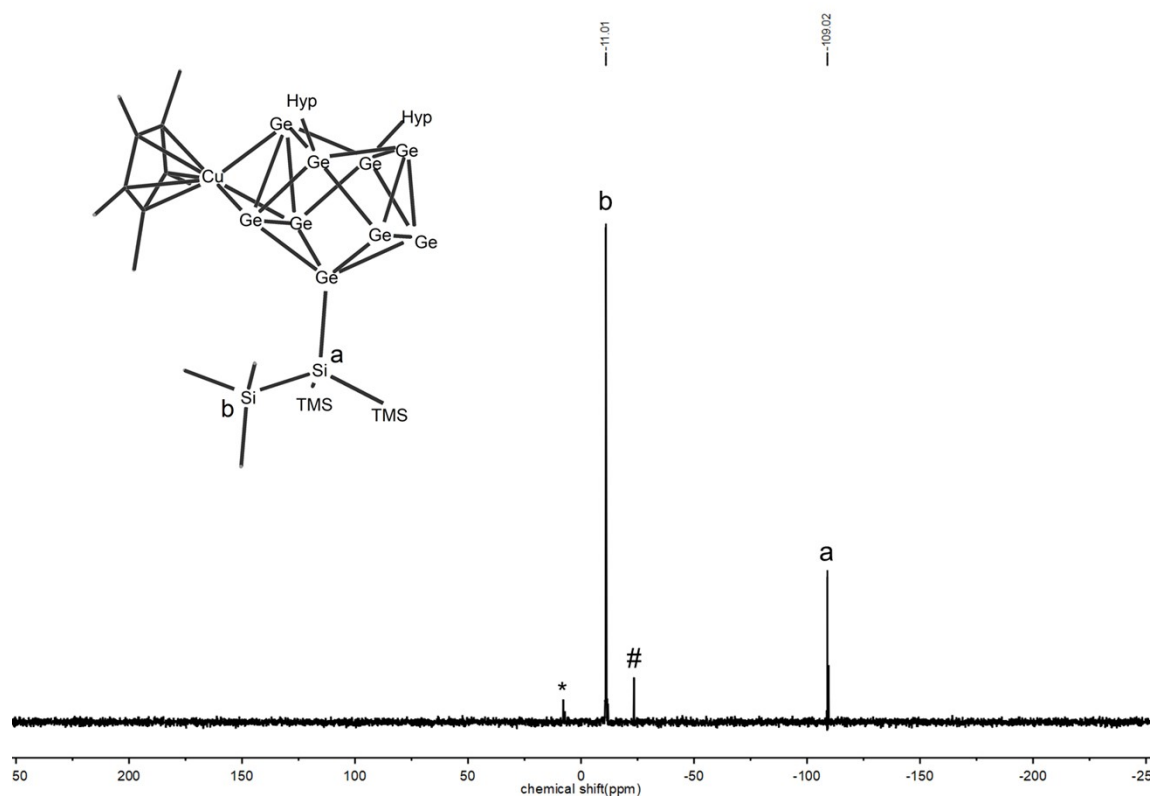

**Figure S15.**  $^{29}\text{Si}$  NMR spectrum (THF- $d_8$ ) of  $[\text{K}(\text{crypt-222})]\mathbf{1}$ . Asterisked signals are caused by unidentified impurities; signal marked with # is caused by silicon grease.

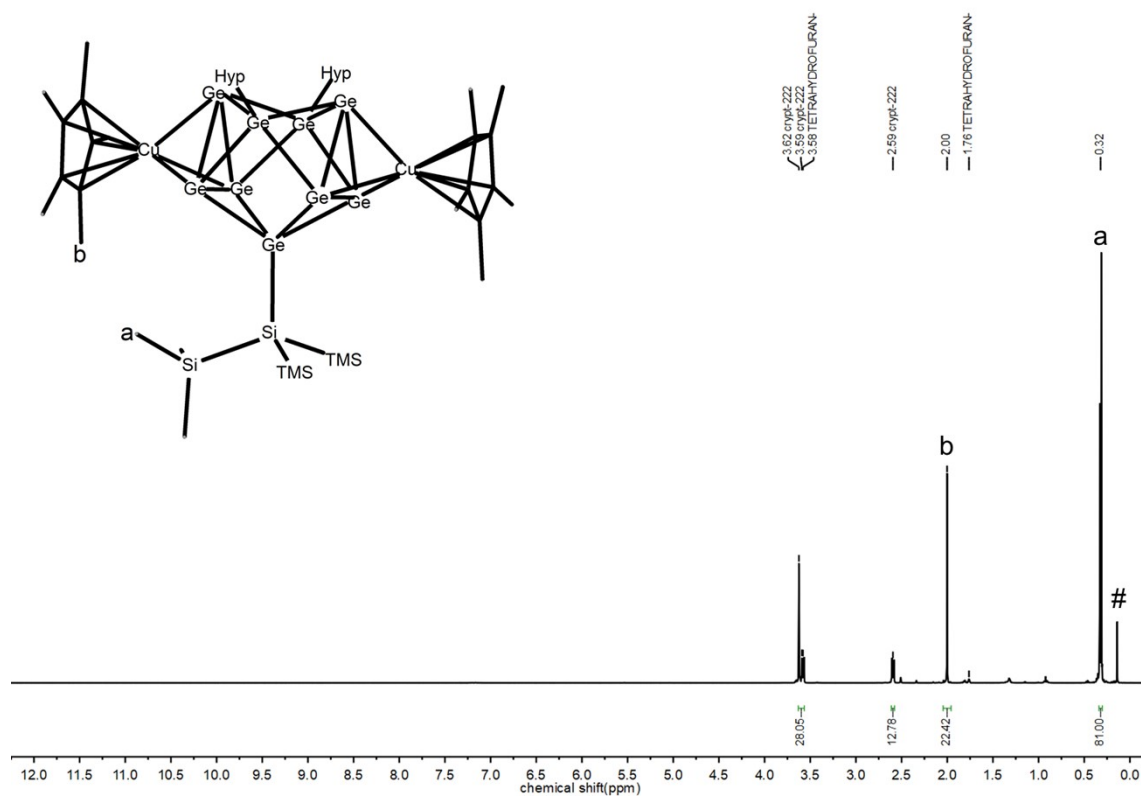

**Figure S16.** <sup>1</sup>H NMR spectrum (THF-d<sub>8</sub>) of  $[K(\text{crypt-222})]_2 \cdot 0.3\text{THF}$ . Signal marked with # is caused by silicon grease.

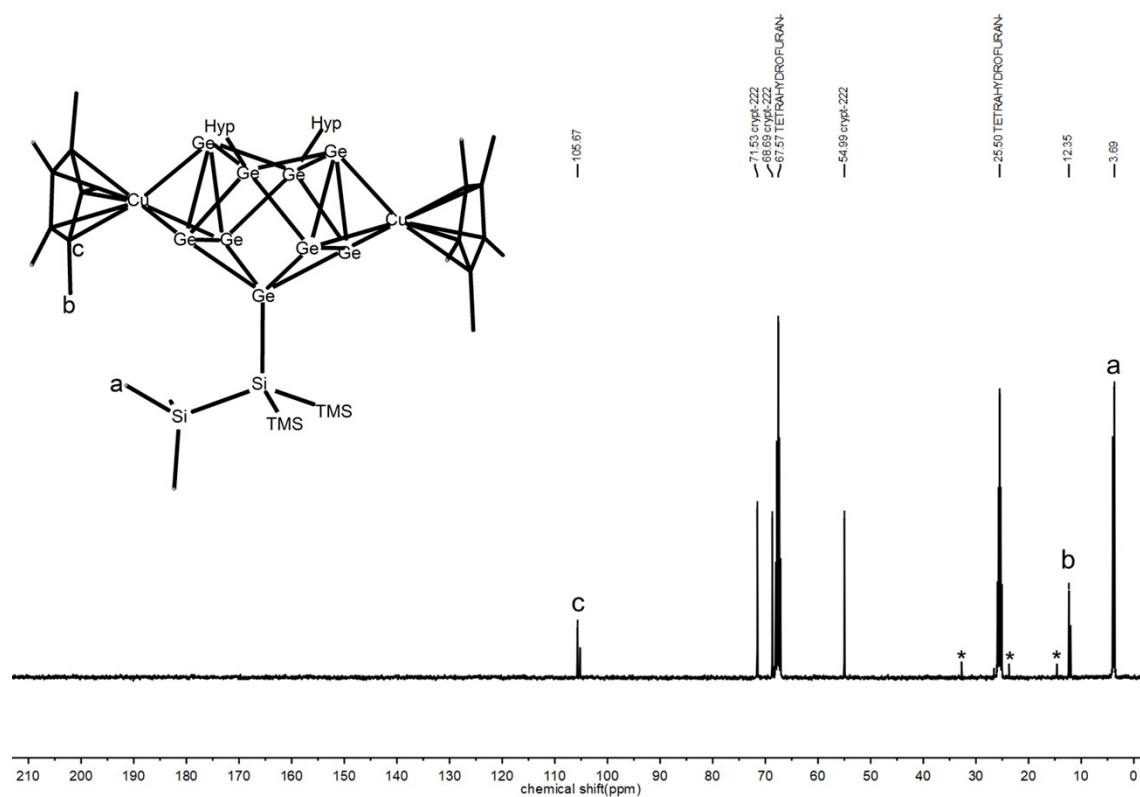

**Figure S17.** <sup>13</sup>C NMR spectrum (THF-d<sub>8</sub>) of  $[K(\text{crypt-222})]_2 \cdot 0.3\text{THF}$ . Asterisked signals are caused by unidentified impurities.

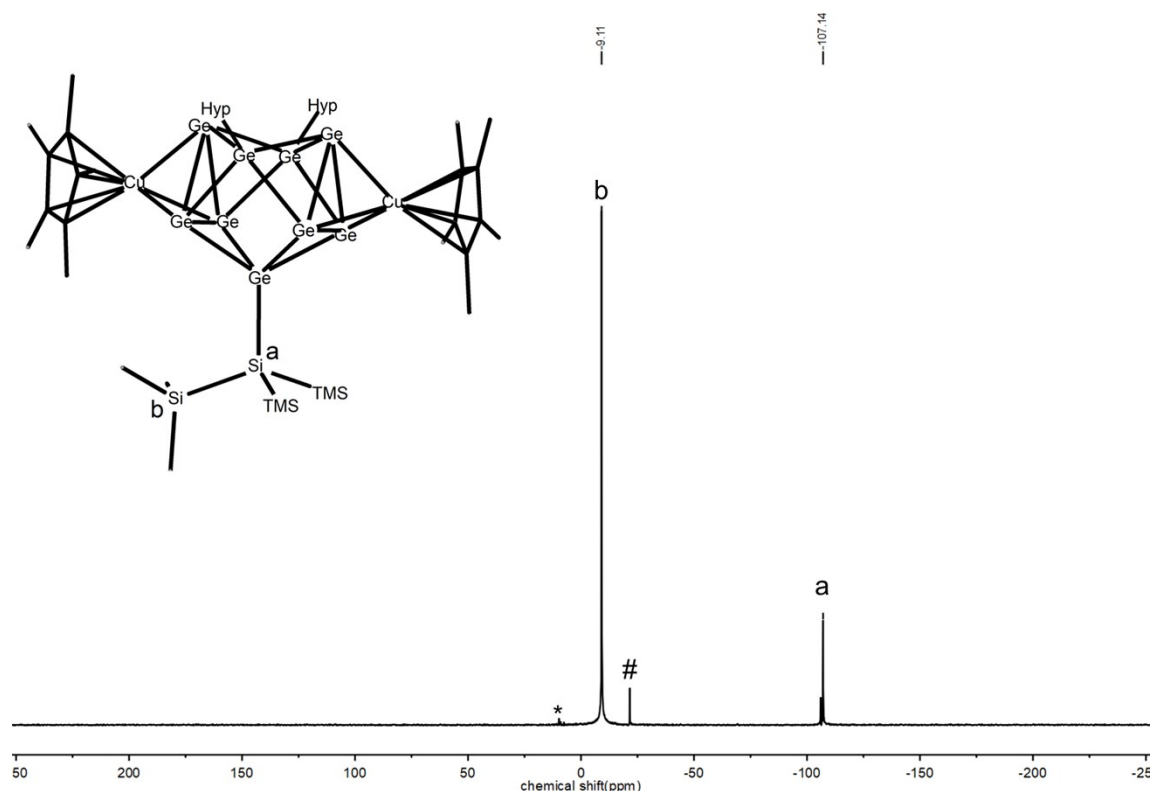

**Figure S18.**  $^{29}\text{Si}$  NMR spectrum (THF- $d_8$ ) of  $[\text{K}(\text{crypt-222})]_2 \cdot 0.3\text{THF}$ . Asterisked signals are caused by unidentified impurities; signal marked with # is caused by silicon grease.

## 5 References for the Supporting Information

- [1] 4,7,13,16,21,24-Hexaoxa-1,10-diazabicyclo[8.8.8]hexacosane.
- [2] 1,1,1,3,3,3-Hexamethyl-2-(trimethylsilyl)-2-chlorotrisilane
- [3] 1,1,1,3,3,3-Hexamethyldisilazane potassium salt
- [4] Feng Li and Slavi C. Sevov, *Inorg. Chem.* **2012**, *51*, 4, 2706–2708.
- [5] G. R. Fulmer, A. J. M. Miller, N. H. Sherden, H. E. Gottlieb, A. Nudelman, B. M. Stoltz, J. E. Bercaw and K. I. Goldberg, *Organometallics*, **2010**, *29*, 2176.
- [6] C. Schenk, F. Henke, G. Santsio-Quinones, I. Krossing and A. Schnepf, *Dalton Trans.* **2008**, 4436–4441.
- [7] F. Li and S. C. Sevov, *Inorg. Chem.*, 2015, **54**, 8121–8125.
- [8] a) S. M. Sheldrick, *Acta Crystallogr* **2015**, *A71*, 3; b) G. M. Sheldrick, *Acta Crystallogr.* **2015**, *C71*, 3.
- [9] a) van der Sluis, P.; Spek, A. L. BYPASS: an Effective Method for the Refinement of Crystal Structures Containing Disordered Solvent Regions. *Acta Cryst.* **1990**, *A46*, 194–201; b) A. Spek, Structure Validation in Chemical Crystallography. *Acta Cryst.* **2009**, *D65*, 148–155.
- [10] a) P. van der Sluis, A. L. Spek, *Acta Crystallogr.* **1990**, *A46*, 194; b) A. Spek, *Acta Crystallogr.* **2009**, *D65*, 148.
- [11] Diamond - Crystal and Molecular Structure Visualization, Crystal Impact - Dr. H. Putz & Dr. K. Brandenburg GbR, Kreuzherrenstr. 102, 53227 Bonn, Germany, <http://www.crystalimpact.com/diamond>.
